# Supplementary material
Source: PubMed Central journal article supplement (PMC6778527)
Supplement: NIHMS1052815-supplement-1.pdf [file NIHMS1052815-supplement-1.pdf]

Supplementary Information for:

**Genetic compatibility and extensibility of orthogonal replication**

Alex A. Javanpour<sup>†</sup> and Chang C. Liu<sup>\*,†,‡,§</sup>

<sup>†</sup>Department of Biomedical Engineering, University of California, Irvine, California 92697,  
United States

<sup>‡</sup>Department of Molecular Biology & Biochemistry, University of California, Irvine, California  
92697, United States

<sup>§</sup>Department of Chemistry, University of California, Irvine, California 92697, United States

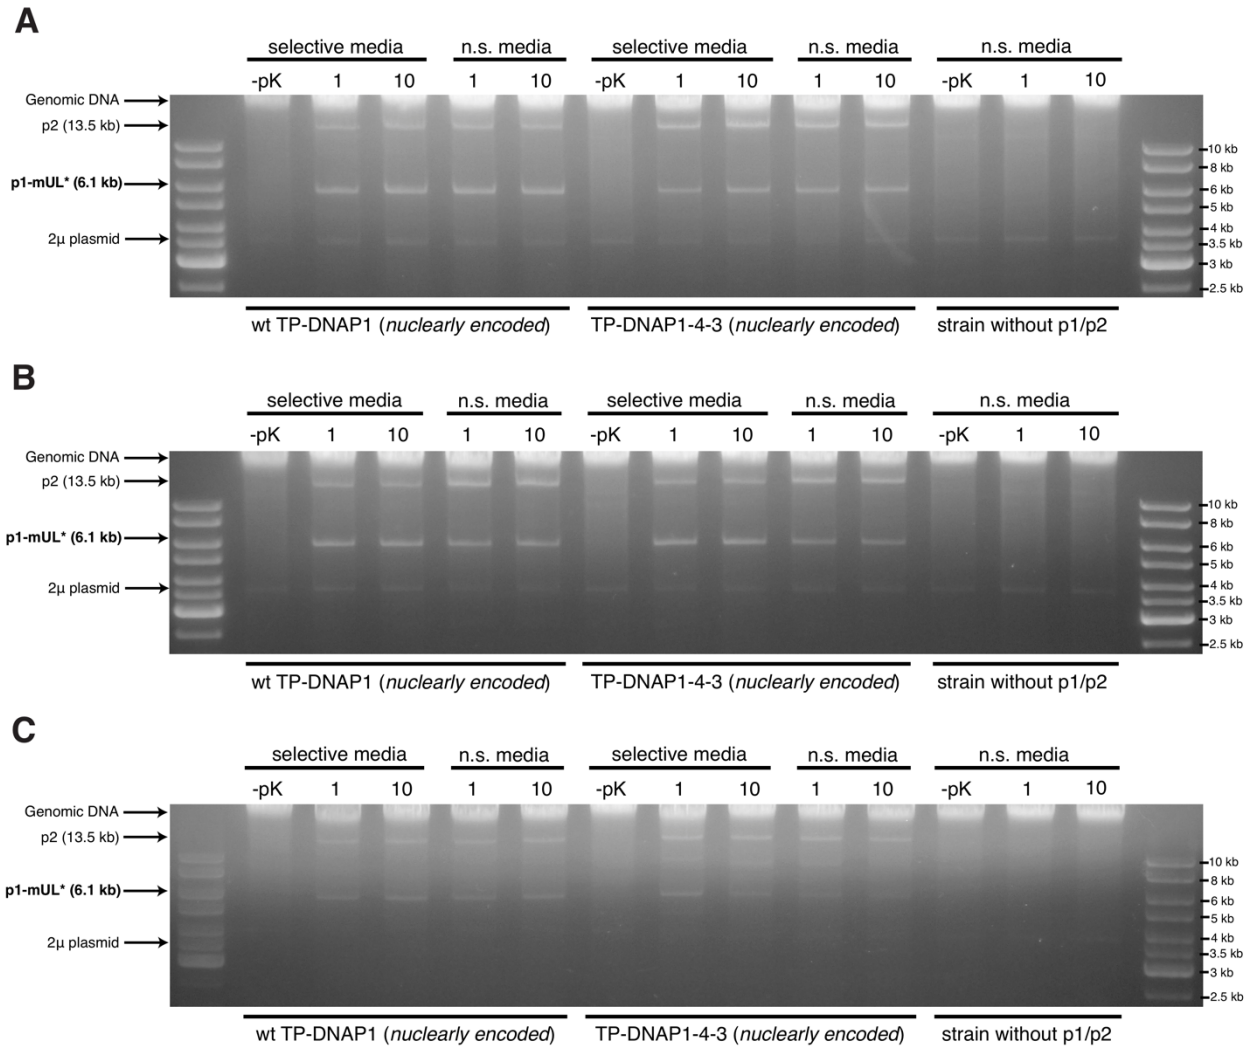

**Figure S1**— Stability of OrthoRep in CEN.PK2-1C (**A**), W303-1A (**B**), and BY4743 (**C**) strains. Agarose gel electrophoresis on DNA extracted from strains show the stability of OrthoRep (presence of p1-mUL\*) over multiple cycles of passaging even without selection. Presence of p1-mUL\* is observed after the first (1) and tenth (10) passage in both selective and non-selective (n.s.) media conditions in the presence of either a wt TP-DNAP1 or error-prone TP-DNAP1-4-3 expressed from a nuclear *CEN6/ARS4* plasmid. Parental strains without p1/p2 are shown as controls. The 2μ plasmid is native to the base strains CEN.PK2-1C, W303-1A, and BY4743. -pK conditions are controls referring to the lack of proteinase K treatment during DNA preparation; the lack of proteinase K treatment results in the lack of all p1/p2-derived bands because the terminal proteins on p1/p2 prevent migration into agarose gels as previously described.<sup>2</sup>

|                     |          | a | b | c | d | e | f | g | h |
|---------------------|----------|---|---|---|---|---|---|---|---|
| non-selective media | glucose  |   |   |   |   |   |   |   |   |
|                     | glycerol |   |   |   |   |   |   |   |   |
| selective media     | glucose  |   |   |   |   |   |   |   |   |
|                     | glycerol |   |   |   |   |   |   |   |   |

**Figure S2**—Ensuring that mitochondrial function hasn't changed in experiments outlined in **Figure 2**. Triplicates cultures from each condition in **Figure 2** (a-h) were spot plated ( $\sim 10^6$  cells) on media non-selective or selective for p1. Plates also either contained glucose or glycerol to assay for any respiration deficiency. Plates were incubated for  $\sim 4$  days. For a, b, e, and f, lack of growth on glycerol shows the expected respiration deficiency of  $\rho^0$  strains. For c, d, g, and h, growth on glycerol shows the expected respiration activity of  $\rho^+$  strains. The red boxes highlight cells where the toxin is active in a  $\rho^+$ , which leads to instability of p1 and results in slower growth when selecting for p1-encoded genes.

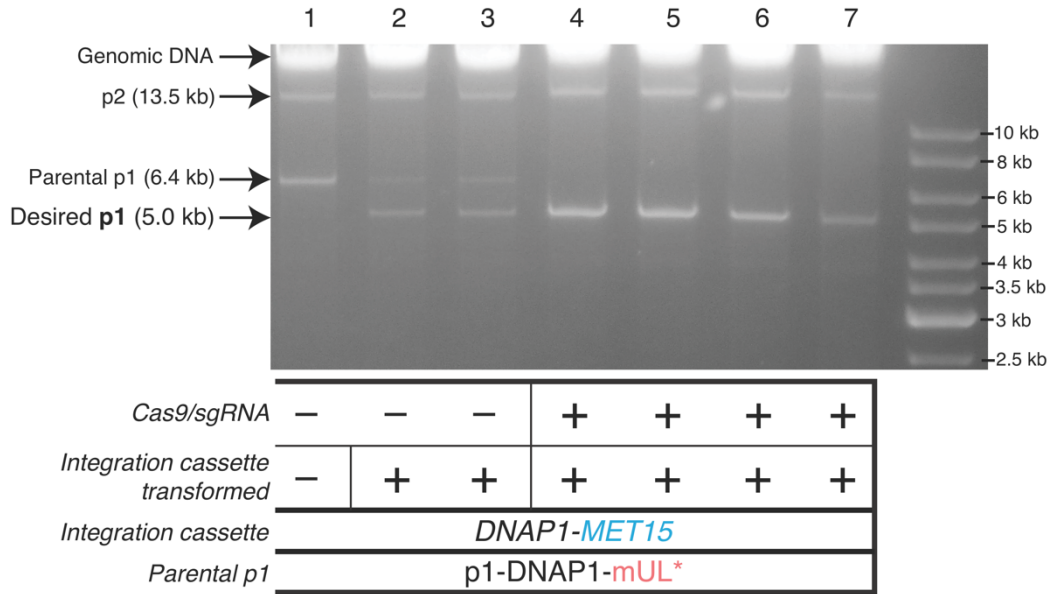

**Figure S3**— Integration of a model cassette (DNAP1-MET15) onto p1 in strains with p1-DNAP1-mUL\* as the parental plasmid. This figure is exactly the same as Figure 3B, except it shows an experiment where the integration cassette genes and the parental p1 genes are swapped. Agarose gel electrophoresis on DNA extracted from cells after transformation and plating is shown (lanes 2-7). Lane 1 is the parental strain. Biological replicates from transformation without Cas9 induction (lanes 2 and 3) show both parental and desired p1 bands whereas biological replicates from a transformation with the integration cassette and concomitant induction of Cas9 (lanes 4-7) shows only the desired p1 band.

**Table S1**— Key plasmids used in this study. (See .xls file)

**Table S2**— Key strains used in this study. (See .xls file)

| #  | Name     | Source                          | Parent Plasmid              | Origin of replication (yeast, bacterial) | Selection Marker (yeast, bacterial) | Notes                                                                                                                                                                           |
|----|----------|---------------------------------|-----------------------------|------------------------------------------|-------------------------------------|---------------------------------------------------------------------------------------------------------------------------------------------------------------------------------|
| 1  | AR-Ec318 | Previous work (Ravikumar, 2018) | See previous work           | <i>CEN6/ARS4, ColE1</i>                  | <i>HIS3, KanR</i>                   | <i>REV1</i> promoter > Recoded wt <i>TP-DNAP1</i>                                                                                                                               |
| 2  | AR-Ec632 | Previous work (Ravikumar, 2018) | See previous work           | <i>CEN6/ARS4, ColE1</i>                  | <i>HIS3, KanR</i>                   | <i>REV1</i> promoter > Recoded <i>TP-DNAP1</i> [L474W, L640Y, I777K, W814N] with <i>HIS3</i> (TP-DNAP1-4-3)                                                                     |
| 3  | AJ-Ec133 | Addgene (#60847)                | N/A                         | <i>2μ, ColE1</i>                         | <i>KanMX, KanR</i>                  | <i>tRNA TYR</i> promoter > HDV ribozyme + sgRNA > <i>SNR52</i> terminator and RNR2 promoter > <i>SpCAS9-SV40NLS-8XHIS</i> > <i>CYC1</i> terminator                              |
| 4  | AJ-Ec145 | This Work                       | AJ-Ec133                    | <i>2μ, ColE1</i>                         | <i>KanMX, KanR</i>                  | contains 2 sgRNAs targetting <i>LEU2</i> locus (GTAATAATGAAGATTACA and TCAAGAATTTACTCTGTCA)                                                                                     |
| 5  | AJ-Ec170 | This Work                       | AJ-Ec133                    | <i>2μ, ColE1</i>                         | <i>KanMX, KanR</i>                  | contains sgRNA targetting <i>URA3</i> (GGGCAACAGTATAGAACCG)                                                                                                                     |
| 6  | AJ-Ec200 | This Work                       | AJ-Ec133                    | <i>2μ, ColE1</i>                         | <i>KanMX, KanR</i>                  | contains sgRNA targetting <i>TRP1</i> (GTCCATTGGTGAAGTTTG)                                                                                                                      |
| 7  | AJ-Ec137 | This Work                       | AJ-Ec133                    | <i>2μ, ColE1</i>                         | <i>KanMX, KanR</i>                  | <i>tRNA TYR</i> promoter > HDV ribozyme + sgRNA > <i>SNR52</i> terminator and RNR2 promoter > <i>SpCAS9</i> > <i>CYC1</i> terminator                                            |
| 8  | AJ-Ec138 | This Work                       | AJ-Ec137                    | <i>2μ, ColE1</i>                         | <i>KanMX, KanR</i>                  | contains sgRNA targetting p1 ORF2 (GCTGATTATACATACAGA)                                                                                                                          |
| 9  | AJ-Ec147 | This Work                       | AJ-Ec137                    | <i>2μ, ColE1</i>                         | <i>KanMX, KanR</i>                  | contains sgRNA targetting <i>mKate2</i> (TCTCAAGTTGCAGATCAGG)                                                                                                                   |
| 10 | AJ-Ec167 | This Work                       | AJ-Ec147                    | <i>2μ, ColE1</i>                         | <i>KanMX, KanR</i>                  | <i>tRNA TYR</i> promoter > HDV ribozyme + <i>mKate2</i> sgRNA > <i>SNR52</i> terminator and <i>GAL2</i> promoter > <i>SpCAS9</i> > <i>CYC1</i> terminator                       |
| 11 | AJ-Ec168 | This Work                       | AJ-Ec167                    | <i>2μ, ColE1</i>                         | <i>KanMX, KanR</i>                  | <i>tRNA TYR</i> promoter > HDV ribozyme + <i>MET15</i> sgRNA (GCTAAGAAGTATCTATCTAA) > <i>SNR52</i> terminator and <i>GAL2</i> promoter > <i>SpCAS9</i> > <i>CYC1</i> terminator |
| 12 | AJ-Ec180 | This Work                       | N/A                         | N/A, <i>ColE1</i>                        | <i>URA3</i> (p1), <i>AmpR</i>       | p1 recombination cassette that integrates ( <i>p2ORF10</i> promoter > <i>URA3</i> ) to the 3' of <i>ORF4</i> to make p1-DNAP1-T/A-U                                             |
| 13 | AR-Ec278 | Previous Work (Ravikumar, 2014) | See previous work           | N/A, <i>ColE1</i>                        | <i>URA3</i> (p1), <i>AmpR</i>       | p1 recombination cassette that integrates <i>URA3</i> and <i>leu2*</i> (538C>T, 539T>G) in place of ORFs 2-4 to create p1-DNAP1-UI*(TGA)                                        |
| 14 | AJ-Ec154 | This work                       | AR-Ec278                    | N/A, <i>ColE1</i>                        | <i>MET15</i> (p1), <i>AmpR</i>      | p1 recombination cassette that integrates ( <i>p1ORF2</i> promoter > <i>MET15</i> ) in place of ORFs 2-4 to make p1-DNAP1-MET15                                                 |
| 15 | AJ-Ec196 | This work                       | AR-Ec505 (unpublished work) | N/A, <i>ColE1</i>                        | <i>URA3</i> (p1), <i>AmpR</i>       | p1 recombination cassette that integrates <i>mKate2</i> , <i>URA3</i> , and <i>leu2*</i> (538 T-C) in place of ORFs 2-4 to make p1-DNAP1-mUI*(TAA)                              |
| 16 | AJ-Ec290 | This work                       | AJ-Ec196                    | N/A, <i>ColE1</i>                        | <i>URA3</i> (p1), <i>AmpR</i>       | p1 recombination cassette that integrates <i>mKate2</i> , <i>URA3</i> , and <i>K. lactis</i> genomic DNA in place of ORFs 2-4 to make p1-DNAP1-mU-ki14                          |
| 17 | AJ-Ec291 | This work                       | AJ-Ec196                    | N/A, <i>ColE1</i>                        | <i>URA3</i> (p1), <i>AmpR</i>       | p1 recombination cassette that integrates <i>mKate2</i> , <i>URA3</i> , and <i>K. lactis</i> genomic DNA in place of ORFs 2-4 to make p1-DNAP1-mU-ki18                          |
| 18 | AJ-Ec292 | This work                       | AJ-Ec196                    | N/A, <i>ColE1</i>                        | <i>URA3</i> (p1), <i>AmpR</i>       | p1 recombination cassette that integrates <i>mKate2</i> , <i>URA3</i> , and <i>K. lactis</i> genomic DNA in place of ORFs 2-4 to make p1-DNAP1-mU-ki22                          |

| Strain     | Genotype                                                                                                                                                                                                                                                                                                                                                       | Parent Strain     |
|------------|----------------------------------------------------------------------------------------------------------------------------------------------------------------------------------------------------------------------------------------------------------------------------------------------------------------------------------------------------------------|-------------------|
| AH22       | <i>MATa can1 his4-519 leu2-3, 112</i>                                                                                                                                                                                                                                                                                                                          | N/A               |
| F102-2     | <i>MATa can1 his4-519 leu2-3, 112</i> $\rho^0$ + p1 + p2                                                                                                                                                                                                                                                                                                       | N/A               |
| AJ-Y86     | <i>MATa can1 leu2<math>\Delta</math>0 ura3<math>\Delta</math>0 his4-519</i> $\rho^0$ + p1 + p2                                                                                                                                                                                                                                                                 | F102-2            |
| AR-Y292    | <i>MATa can1 his3 leu2<math>\Delta</math>0 ura3<math>\Delta</math>0 HIS4</i> $\rho^0$ + p1 + p2                                                                                                                                                                                                                                                                | See previous work |
| AJ-Y119    | <i>MATa can1 his3 leu2<math>\Delta</math>0 ura3<math>\Delta</math>0 HIS4</i> $\rho^0$ + p1-DNAP1-TA-U [ <i>p1ORF4::URA3</i> ] + p2                                                                                                                                                                                                                             | AR-Y292           |
| AJ-Y95     | <i>MATa can1 leu2<math>\Delta</math>0 ura3<math>\Delta</math>0 his4-519</i> $\rho^0$ + p1-DNAP1-mUL*(TAA) [ <i>p1orf2<math>\Delta</math>::URA3/mKate2/leu2(538C&gt;T)</i> ] + p2                                                                                                                                                                               | AJ-Y86            |
| AR-Y       | <i>MATa can1 his3 leu2<math>\Delta</math>0 ura3<math>\Delta</math>0 HIS4</i> $\rho^0$ + p1-mUL*(TAA) [ <i>tpdnap1<math>\Delta</math>::URA3/mKate2/leu2(538C&gt;T)</i> ] + p2 + AR-Ec318                                                                                                                                                                        | See previous work |
| AR-Y       | <i>MATa can1 his3 leu2<math>\Delta</math>0 ura3<math>\Delta</math>0 HIS4</i> $\rho^0$ + p1-mUL*(TAA) [ <i>tpdnap1<math>\Delta</math>::URA3/mKate2/leu2(538C&gt;T)</i> ] + p2 + AR-Ec632                                                                                                                                                                        | See previous work |
| AR-Y       | <i>MATa can1 his3 LEU2 URA3 HIS4</i> $\rho^0$ + p1-mW [ <i>tpdnap1<math>\Delta</math>::TRP1/mKate2</i> ] + p2 + AR-Ec318                                                                                                                                                                                                                                       | See previous work |
| AR-Y       | <i>MATa can1 his3 LEU2 URA3 HIS4</i> $\rho^0$ + p1-mW [ <i>tpdnap1<math>\Delta</math>::TRP1/mKate2</i> ] + p2 + AR-Ec632                                                                                                                                                                                                                                       | See previous work |
| BY4741     | <i>MATa his3 <math>\Delta</math> 1 leu2<math>\Delta</math>0 met15<math>\Delta</math>0 ura3<math>\Delta</math>0</i> $\rho^+$                                                                                                                                                                                                                                    | N/A               |
| AJ-Y90     | <i>MATa his3 <math>\Delta</math> 1 leu2<math>\Delta</math>0 met15<math>\Delta</math>0 ura3<math>\Delta</math>0</i> $\rho^+$ + p1-DNAP1-mUL*(TAA) [ <i>p1orf2<math>\Delta</math>::URA3/mKate2/leu2(538C&gt;T)</i> ] + p2                                                                                                                                        | BY4741            |
| AJ-Y91     | <i>MATa his3 <math>\Delta</math> 1 leu2<math>\Delta</math>0 met15<math>\Delta</math>0 ura3<math>\Delta</math>0</i> $\rho^+$ + p1-DNAP1-mUL*(TAA) [ <i>p1orf2<math>\Delta</math>::URA3/mKate2/leu2(538C&gt;T)</i> ] + p2 + AJ-Ec167                                                                                                                             | AJ-Y90            |
| AJ-Y92     | <i>MATa his3 <math>\Delta</math> 1 leu2<math>\Delta</math>0 met15<math>\Delta</math>0 ura3<math>\Delta</math>0</i> $\rho^+$ + p1-DNAP1-MET15 [ <i>p1orf2<math>\Delta</math>::MET15</i> ] + p2 + AJ-Ec168                                                                                                                                                       | AJ-Y91            |
| AJ-Y170    | <i>MATa his3 <math>\Delta</math> 1 leu2<math>\Delta</math>0 met15<math>\Delta</math>0 ura3<math>\Delta</math>0</i> $\rho^+$ + p1-mUL*(TAA) [ <i>tpdnap1<math>\Delta</math>::URA3/mKate2/leu2(538C&gt;T)</i> ] + p2 + AR-Ec318                                                                                                                                  | BY4741            |
| AJ-Y171    | <i>MATa his3 <math>\Delta</math> 1 leu2<math>\Delta</math>0 met15<math>\Delta</math>0 ura3<math>\Delta</math>0</i> $\rho^+$ + p1-mUL*(TAA) [ <i>tpdnap1<math>\Delta</math>::URA3/mKate2/leu2(538C&gt;T)</i> ] + p2 + AR-Ec632                                                                                                                                  | BY4741            |
| AJ-Y190    | <i>MATa his3 <math>\Delta</math> 1 LEU2 met15<math>\Delta</math>0 URA3</i> $\rho^+$                                                                                                                                                                                                                                                                            | BY4741            |
| AJ-Y191    | <i>MATa his3 <math>\Delta</math> 1 LEU2 met15<math>\Delta</math>0 URA3</i> $\rho^+$ + p1-mW [ <i>tpdnap1<math>\Delta</math>::TRP1/mKate2</i> ] + p2 + AR-Ec318                                                                                                                                                                                                 | AJ-Y190           |
| AJ-Y192    | <i>MATa his3 <math>\Delta</math> 1 LEU2 met15<math>\Delta</math>0 URA3</i> $\rho^+$ + p1-mW [ <i>tpdnap1<math>\Delta</math>::TRP1/mKate2</i> ] + p2 + AR-Ec632                                                                                                                                                                                                 | AJ-Y190           |
| AJ-Y120    | <i>MATa his3 <math>\Delta</math> 1 leu2<math>\Delta</math>0 met15<math>\Delta</math>0 ura3<math>\Delta</math>0</i> $\rho^+$ + p1-DNAP1-TA-U [ <i>p1met15<math>\Delta</math>::URA3</i> ] + p2                                                                                                                                                                   | AJ-Y92            |
| AJ-Y231    | <i>MATa his3 <math>\Delta</math> 1 leu2<math>\Delta</math>0 met15<math>\Delta</math>0 ura3<math>\Delta</math>0</i> $\rho^+$ + p1-DNAP1-mU-kl14 [ <i>p1met15<math>\Delta</math>::mKate2/URA3/kl14</i> ] + p2                                                                                                                                                    | AJ-Y92            |
| AJ-Y232    | <i>MATa his3 <math>\Delta</math> 1 leu2<math>\Delta</math>0 met15<math>\Delta</math>0 ura3<math>\Delta</math>0</i> $\rho^+$ + p1-DNAP1-mU-kl18 [ <i>p1met15<math>\Delta</math>::mKate2/URA3/kl18</i> ] + p2                                                                                                                                                    | AJ-Y92            |
| AJ-Y233    | <i>MATa his3 <math>\Delta</math> 1 leu2<math>\Delta</math>0 met15<math>\Delta</math>0 ura3<math>\Delta</math>0</i> $\rho^+$ + p1-DNAP1-mU-kl22 [ <i>p1met15<math>\Delta</math>::mKate2/URA3/kl22</i> ] + p2                                                                                                                                                    | AJ-Y92            |
| BY4743     | <i>MATa <math>\alpha</math> his3<math>\Delta</math>1/his3<math>\Delta</math>1 leu2<math>\Delta</math>0/leu2<math>\Delta</math>0 LYS2/lys2<math>\Delta</math>0 met15<math>\Delta</math>0/MET15 ura3<math>\Delta</math>0/ura3<math>\Delta</math>0</i> $\rho^+$                                                                                                   | N/A               |
| AJ-Y172    | <i>MATa <math>\alpha</math> his3<math>\Delta</math>1/his3<math>\Delta</math>1 leu2<math>\Delta</math>0/leu2<math>\Delta</math>0 LYS2/lys2<math>\Delta</math>0 met15<math>\Delta</math>0/MET15 ura3<math>\Delta</math>0/ura3<math>\Delta</math>0</i> $\rho^+$ + p1-mUL*(TAA) [ <i>tpdnap1<math>\Delta</math>::URA3/mKate2/leu2(538C&gt;T)</i> ] + p2 + AR-Ec318 | BY4743            |
| AJ-Y173    | <i>MATa <math>\alpha</math> his3<math>\Delta</math>1/his3<math>\Delta</math>1 leu2<math>\Delta</math>0/leu2<math>\Delta</math>0 LYS2/lys2<math>\Delta</math>0 met15<math>\Delta</math>0/MET15 ura3<math>\Delta</math>0/ura3<math>\Delta</math>0</i> $\rho^+$ + p1-mUL*(TAA) [ <i>tpdnap1<math>\Delta</math>::URA3/mKate2/leu2(538C&gt;T)</i> ] + p2 + AR-Ec632 | BY4743            |
| AJ-Y193    | <i>MATa <math>\alpha</math> his3<math>\Delta</math>1/his3<math>\Delta</math>1 LEU2/LEU2 LYS2/lys2<math>\Delta</math>0 met15<math>\Delta</math>0/MET15 URA3::kanMX/ura3<math>\Delta</math>0</i> $\rho^+$                                                                                                                                                        | BY4743            |
| AJ-Y194    | <i>MATa <math>\alpha</math> his3<math>\Delta</math>1/his3<math>\Delta</math>1 LEU2/LEU2 LYS2/lys2<math>\Delta</math>0 met15<math>\Delta</math>0/MET15 URA3::kanMX/ura3<math>\Delta</math>0</i> $\rho^+$ + p1-mW [ <i>tpdnap1<math>\Delta</math>::TRP1/mKate2</i> ] + p2 + AR-Ec318                                                                             | AJ-Y193           |
| AJ-Y195    | <i>MATa <math>\alpha</math> his3<math>\Delta</math>1/his3<math>\Delta</math>1 LEU2/LEU2 LYS2/lys2<math>\Delta</math>0 met15<math>\Delta</math>0/MET15 URA3::kanMX/ura3<math>\Delta</math>0</i> $\rho^+$ + p1-mW [ <i>tpdnap1<math>\Delta</math>::TRP1/mKate2</i> ] + p2 + AR-Ec632                                                                             | AJ-Y193           |
| CEN.PK2-1C | <i>MATa ura3-52 trp1-289 leu2-3,112 his3<math>\Delta</math>1</i> $\rho^+$                                                                                                                                                                                                                                                                                      | N/A               |
| AJ-Y073    | <i>MATa ura3<math>\Delta</math>0 trp1-289 leu2<math>\Delta</math>0 his3<math>\Delta</math>1</i> $\rho^+$                                                                                                                                                                                                                                                       | CEN.PK2-1C        |
| AJ-Y078    | <i>MATa ura3<math>\Delta</math>0 TRP1 leu2<math>\Delta</math>0 his3<math>\Delta</math>1</i> $\rho^+$                                                                                                                                                                                                                                                           | AJ-Y073           |
| AJ-Y174    | <i>MATa ura3<math>\Delta</math>0 TRP1 leu2<math>\Delta</math>0 his3<math>\Delta</math>1</i> $\rho^+$ + p1-mUL*(TAA) [ <i>tpdnap1<math>\Delta</math>::URA3/mKate2/leu2(538C&gt;T)</i> ] + p2 + AR-Ec318                                                                                                                                                         | AJ-Y073           |
| AJ-Y175    | <i>MATa ura3<math>\Delta</math>0 TRP1 leu2<math>\Delta</math>0 his3<math>\Delta</math>1</i> $\rho^+$ + p1-mUL*(TAA) [ <i>tpdnap1<math>\Delta</math>::URA3/mKate2/leu2(538C&gt;T)</i> ] + p2 + AR-Ec632                                                                                                                                                         | AJ-Y073           |
| AJ-Y196    | <i>MATa URA3 trp1<math>\Delta</math>0 LEU2 his3<math>\Delta</math>1</i> $\rho^+$                                                                                                                                                                                                                                                                               | CEN.PK2-1C        |
| AJ-Y197    | <i>MATa URA3 trp1<math>\Delta</math>0 LEU2 his3<math>\Delta</math>1</i> $\rho^+$ + p1-mW [ <i>tpdnap1<math>\Delta</math>::TRP1/mKate2</i> ] + p2 + AR-Ec318                                                                                                                                                                                                    | AJ-Y196           |
| AJ-Y198    | <i>MATa URA3 trp1<math>\Delta</math>0 LEU2 his3<math>\Delta</math>1</i> $\rho^+$ + p1-mW [ <i>tpdnap1<math>\Delta</math>::TRP1/mKate2</i> ] + p2 + AR-Ec632                                                                                                                                                                                                    | AJ-Y196           |
| W303-1A    | <i>MATa ade2-1 his3-11,15 leu2-3,112 trp1-1 ura3-1 can1-100</i> $\rho^+$                                                                                                                                                                                                                                                                                       | N/A               |
| AJ-Y074    | <i>MATa ade2-1 his3-11,15 leu2<math>\Delta</math>0 trp1-1 ura3<math>\Delta</math>0 can1-100</i> $\rho^+$                                                                                                                                                                                                                                                       | W303-1A           |
| AJ-Y079    | <i>MATa ade2-1 his3-11,15 leu2<math>\Delta</math>0 TRP1 ura3<math>\Delta</math>0 can1-100</i> $\rho^+$                                                                                                                                                                                                                                                         | AJ-Y074           |
| AJ-Y176    | <i>MATa ade2-1 his3-11,15 leu2<math>\Delta</math>0 TRP1 ura3<math>\Delta</math>0 can1-100</i> $\rho^+$ + p1-mUL*(TAA) [ <i>tpdnap1<math>\Delta</math>::URA3/mKate2/leu2(538C&gt;T)</i> ] + p2 + AR-Ec318                                                                                                                                                       | AJ-Y074           |
| AJ-Y177    | <i>MATa ade2-1 his3-11,15 leu2<math>\Delta</math>0 TRP1 ura3<math>\Delta</math>0 can1-100</i> $\rho^+$ + p1-mUL*(TAA) [ <i>tpdnap1<math>\Delta</math>::URA3/mKate2/leu2(538C&gt;T)</i> ] + p2 + AR-Ec632                                                                                                                                                       | AJ-Y074           |
| AJ-Y199    | <i>MATa ade2-1 his3-11,15 LEU2 trp1-1 URA3 can1-100</i> $\rho^+$                                                                                                                                                                                                                                                                                               | W303-1A           |
| AJ-Y200    | <i>MATa ade2-1 his3-11,15 LEU2 trp1-1 URA3 can1-100</i> $\rho^+$ + p1-mW [ <i>tpdnap1<math>\Delta</math>::TRP1/mKate2</i> ] + p2 + AR-Ec318                                                                                                                                                                                                                    | AJ-Y199           |
| AJ-Y201    | <i>MATa ade2-1 his3-11,15 LEU2 trp1-1 URA3 can1-100</i> $\rho^+$ + p1-mW [ <i>tpdnap1<math>\Delta</math>::TRP1/mKate2</i> ] + p2 + AR-Ec632                                                                                                                                                                                                                    | AJ-Y199           |
